1 **Pitfalls in SARS-CoV-2 PCR diagnostics**

2

3 Kerstin Wernike <sup>a,1</sup>, Markus Keller <sup>a,1</sup>, Franz J. Conraths <sup>a</sup>, Thomas C. Mettenleiter <sup>a</sup>, Martin H.

4 Groschup <sup>a, \*</sup>, Martin Beer <sup>a, \*</sup>

5

6 <sup>a</sup> Friedrich-Loeffler-Institut, Südufer 10, 17493 Greifswald-Insel Riems, Germany

7

8 \*Addresses for correspondence:

9 Martin H. Groschup, Institute of Novel and Emerging Infectious Diseases, Friedrich-Loeffler-

10 Institut, Südufer 10, 17493 Greifswald-Insel Riems, Germany; email: martin.groschup@fli.de;

11 Martin Beer, Institute of Diagnostic Virology, Friedrich-Loeffler-Institut, Südufer 10, 17493

12 Greifswald – Insel Riems, Germany; email: martin.beer@fli.de

13

14 <sup>1</sup> These authors contributed equally to this article.

15 **Abstract**

16 To combat the COVID-19 pandemic, millions of PCR tests are performed worldwide. Any  
17 deviation of the diagnostic sensitivity and specificity will reduce the predictive values of the test.  
18 Here, we report the occurrence of contaminations of commercial primers/probe sets with the  
19 SARS-CoV-2 target sequence of the RT-qPCR as an example for pitfalls during PCR diagnostics  
20 affecting diagnostic specificity. In several purchased in-house primers/probe sets, quantification  
21 cycle values as low as 17 were measured for negative control samples. However, there were also  
22 primers/probe sets that displayed very low-level contaminations, which were detected only  
23 during thorough internal validation. Hence, it appears imperative to pre-test each batch of  
24 reagents extensively before use in routine diagnosis, to avoid false-positive results and low  
25 positive predictive value in low-prevalence situations. As such, contaminations may have  
26 happened more widely, COVID-19 diagnostic results should be re-assessed retrospectively to  
27 validate the epidemiological basis for control measures.

28

29 **Keywords:** COVID-19, coronavirus, real-time PCR, contamination, diagnostics, swab, pooling

## 30 **Introduction**

31           In December 2019, an outbreak of an unexplained acute respiratory disease of humans  
32 was reported in Wuhan, China (WHO, 2020d). As causative agent of the disease now named  
33 COVID-19, a novel betacoronavirus referred to as severe acute respiratory syndrome coronavirus  
34 2 (SARS-CoV-2, previously known as 2019-nCoV) was identified (Zhu et al., 2020). COVID-19  
35 rapidly evolved into a global pandemic (WHO, 2020b) resulting in millions of infections and  
36 several hundred thousands of deaths. Overall, about 20 % of the symptomatic infections are  
37 severe or critical, with much higher rates in the elderly or when certain underlying health  
38 conditions exist (WHO, 2020b). However, also asymptomatic infections occur and it is estimated  
39 that virus transmission from asymptomatic humans accounts for about half of all COVID-19  
40 cases (He et al., 2020), which might be particularly critical when asymptotically infected  
41 health care workers transmit the virus in hospitals or care homes for the elderly.

42           Diagnosis is currently based primarily on real-time RT-PCR (RT-qPCR) using nasal or  
43 throat swabs. To identify and isolate infected individuals, thereby interrupting transmission  
44 chains, millions of RT-qPCR tests are carried out (Hasell et al., 2020). With such a large number  
45 of diagnostic tests and yet low prevalences of infected humans, it is of utmost importance to  
46 ensure a high level of quality management in the testing laboratories to guarantee an optimal and  
47 reliable diagnostic accuracy. Any deviation of the diagnostic specificity of the PCRs, e.g.  
48 through contamination of reagents with target sequences, mix-up or cross-contamination of  
49 samples will significantly reduce the positive predictive value of the test. Here, we report  
50 contamination of commercial primers and probes with oligonucleotides as an example for pitfalls  
51 during PCR diagnostics with a drastic effect on diagnostic specificity. This example emphasizes  
52 the need for continuous and comprehensive quality management in all diagnostics steps.

53 **This study**

54 For the detection of SARS-CoV-2 genome, two real-time PCRs listed on the website of  
55 the World Health Organization (WHO) (WHO, 2020a) were established and validated in our  
56 laboratory. To increase the diagnostic accuracy, systems targeting different genomic regions  
57 were selected. The first assay (“E-Sarbeco”) is based on the E gene coding region (Corman et al.,  
58 2020) and the second assay (“nCoV\_IP4”) targets the RNA-dependent RNA polymerase (RdRp)  
59 gene (WHO, 2020a). To control for efficient RNA extraction and amplification, both assays were  
60 combined with an internal control system based on the housekeeping gene beta-actin (Wernike et  
61 al., 2011). Primers and probes were ordered from four different commercial companies in March  
62 and April 2020, amongst them major oligonucleotide suppliers on the European market. Both  
63 duplex SARS-CoV-2/beta actin real-time PCR systems were validated using two different real-  
64 time PCR kits, namely the AgPath-ID™ One-Step RT-PCR kit and the SuperScript III One Step  
65 RT-PCR kit (both produced by Thermo Fisher Scientific, Germany) to increase flexibility in case  
66 of supply shortage.

67 As part of our internal quality management, each batch of primers/probe is investigated  
68 regarding its sensitivity and specificity using SARS-CoV-2 RNA and negative samples  
69 (phosphate buffered saline (PBS) or nuclease-free water) before the oligonucleotides are applied  
70 in routine diagnosis. During these pre-tests, the first primers/probe sets from supplier A  
71 purchased in March 2020 (set A-1) performed as expected. However, subsequently, very high  
72 genome loads were found in some newly purchased E-Sarbeco primers/probe sets. Quantification  
73 cycle (Cq) values as low as ~17 or ~22 were measured in negative control samples (table 1)  
74 indicating a high level of contamination in reagents obtained from some oligonucleotide  
75 suppliers. While the problems in performance are obvious in these cases, there were also

76 primers/probe sets that displayed contaminations only at lower levels. As an example, when we  
77 used a separate batch of oligonucleotides from supplier A (set A-2), only two out of 27 negative  
78 control samples reacted weakly positive. To exclude the PCR chemistry or the internal control  
79 oligonucleotides as potential sources of the false-positive results, samples from the first German  
80 proficiency test on COVID-19 diagnostics (INSTAND e. V. and GBD Gesellschaft für  
81 Biotechnologische Diagnostik mbH) as well as seven negative RNA isolation controls (RIC  
82 = PBS) were tested using the incriminated primers/probes in combination with two different  
83 batches of both RT-PCR kits. Every combination, in which the first set of primers/probe was  
84 applied, yielded correct results, while the incriminated primers/probe (set A-2) resulted in several  
85 false-positive results regardless of the applied PCR chemistry (figure 1). Hence, the primers or  
86 the probe were the cause of the false-positive reactions, a phenomenon that seems to occur  
87 frequently (table 1). The main reason for the wide distribution of contaminated primers or probes  
88 may be the simultaneous production of long oligonucleotides containing SARS-CoV-2 target  
89 sequences for real-time RT-PCRs. Especially during the first phase of the establishment and  
90 internal validation of SARS-CoV-2 specific real-time RT-PCRs, such oligonucleotides have  
91 been widely used as positive controls and were produced by many primer/probe suppliers  
92 (Mögling et al., 2020).

93 To investigate the impact of the low-level primer/probe contamination on the diagnostic  
94 specificity, 41 human throat swabs were tested with the different primers/probe sets A-1, A-2,  
95 A-3, and B. Swabs were collected in 1 ml PBS and total nucleic acid extracted from this swab  
96 medium either manually (QIAamp Viral RNA Mini, Qiagen, Germany; extraction volume  
97 140 µl) or automated (NucleoMag VET kit, MACHERY-NAGEL GmbH & Co. KG, Germany;  
98 extraction volume 100 µl). To exclude nonspecific reactions, which could be caused by other

99 human coronaviruses potentially present in the throat swab samples, 47 oral or nasal swabs of  
100 bovine origin (taken before the SARS-CoV-2 pandemic) were included. These specimens  
101 represented routine submissions to the Friedrich-Loeffler-Institut, Federal Research Institute for  
102 Animal Health, or originated from an unrelated animal trial (Wernike et al., 2018). Positive  
103 predictive values were calculated using EpiTools  
104 (<https://epitools.ausvet.com.au/predictivevalues>).

105 All human and bovine swab samples scored negative by the nCoV\_IP4 assay and the first  
106 E-Sarbeco primers/probe set delivered at the 25<sup>th</sup> of March 2020 (set A-1) (table 1). However,  
107 when tested by the oligonucleotides A-2, A-3 and B, a total of 13, five and seven of the negative  
108 samples scored positive, respectively. Since the empty control (NTC = nuclease free water),  
109 which was included in the PCR runs, reacted negatively as expected, the PCRs would have been  
110 considered valid during routine diagnostics. Thus, the samples would have been incorrectly  
111 diagnosed as positive in settings, where no cut-off for positivity is defined.

112 If we assume a best-case scenario for specificity based on these results for the A-3 or B /  
113 E-Sarbeco setting, the diagnostic specificity was calculated as 0.9756 (40/41; table 1). In  
114 calendar week 14 of 2020, 36,885 out of 408,348 samples (9.0%) tested positive in Germany  
115 (Robert-Koch-Institut, 2020). Under these conditions, the positive predictive value of the test  
116 system was 0.802, i.e. almost 20% of the positive results would have been false-positive. In  
117 calendar week 19, 10,187 out of 382,154 samples (2.7%) tested positive. In this scenario, a test  
118 system with a diagnostic specificity of 0.9756 had resulted in a positive predictive value of  
119 0.5319, i.e. almost half of the positive results would have been false-positive. Obviously, any  
120 further reduction of the prevalence of SARS-CoV-2 infections will result in decrease of the  
121 positive predictive value if the specificity of the employed assays is not dramatically increased.

122 Not only in-house PCRs need to be thoroughly validated in every laboratory, but also  
123 commercial kits (Rahman et al., 2020), as they may contain similar primer/probe mixes and  
124 produce incorrectly positive results, which will also result in a low positive predictive value.

125 As an additional component of quality assurance, the preparation of small sample pools  
126 might be considered in areas or scenarios with low prevalences (e.g. among asymptomatic  
127 persons), which conserves resources and increases sample throughput (Abdalhamid et al., 2020,  
128 Eis-Hübinger et al., 2020, Yelin et al., 2020). Most importantly, when such a pool scores  
129 positive, all samples need to be re-tested individually, where at least one individual sample  
130 should result in the same or a higher virus load than the sample pool itself. In the case of  
131 contaminations as described above, the pool will show implausible results during follow-up  
132 testing markedly increasing the diagnostic specificity. The WHO recommends widespread  
133 testing to combat the COVID-19 pandemic (WHO, 2020b). However, the capacity of SARS-  
134 CoV-2 for explosive spread has not only overwhelmed weaker health systems, but also  
135 challenges diagnostic capacities (Hasell et al., 2020, WHO, 2020b). Where testing capacity  
136 cannot meet the needs, even a prioritization of testing has to be implemented (European  
137 Commission, 2020, WHO, 2020c). In such settings of limited resources, pooling of samples  
138 might be an option for the serial screening of e.g. asymptomatic health care workers, which is  
139 highly recommended to prevent nosocomial transmission of the virus (Rivett et al., 2020). Here,  
140 the samples of the German proficiency test (INSTAND e. V. and GBD Gesellschaft für  
141 Biotechnologische Diagnostik mbH) were tested in pools consisting of the respective ring trial  
142 sample and four negative human throat swabs. The values obtained from the pools were about  
143 2.2 Cq higher than the values of the respective individual samples, but the final assessment was  
144 always correct, i.e. each positive sample was correctly identified (figure 2). While there is

145 undoubtedly a (minor) decrease in analytical sensitivity, the pooling option needs to be carefully  
146 considered in the light of the current epidemiological situation, as every positive pool needs to be  
147 dissolved anyway to test the samples individually. Nevertheless, to screen certain groups, in  
148 which the expected prevalence of positive samples is low, pooling might be a resource- and cost-  
149 effective option with a minimal loss of diagnostic sensitivity, but with an increase in diagnostic  
150 specificity.

151

## 152 **Conclusions**

153 To ensure a high level of diagnostic accuracy, it is highly recommended to pre-test each  
154 batch of PCR reagents thoroughly before applying it in routine diagnosis using more than 50  
155 negative samples for specificity testing. Furthermore, it is of utmost importance to include also a  
156 reasonable number of appropriate controls such as NTCs, negative extraction controls and  
157 positive controls in every PCR run to minimize the risk of incorrect results further. Additional  
158 external quality assessment of the analytical results could be achieved by the participation in  
159 interlaboratory proficiency trials (FAO, 2015). Finally, in well-validated PCR-workflows,  
160 pooling of up to five samples might be an option for expanding capacities especially for the  
161 routine testing of low prevalences groups without any COVID-19-specific symptoms.

162

## 163 **Acknowledgments**

164 We thank Bianka Hillmann, Katrin Schwabe and René Schöttner for excellent technical  
165 assistance. The study was supported by intramural funding of the German Federal Ministry of  
166 Food and Agriculture provided to the Friedrich-Loeffler-Institut.

167



168 **Ethical Statement**

169 Anonymized human pharyngeal swab samples were obtained in the context of a  
170 COVID-19 monitoring study of the University Medicine of Greifswald (collaboration partner:  
171 Friedrich-Loeffler-Institut of Medical Microbiology): (SeCo study, registration number BB  
172 068/20 by Ethics commission of the Greifswald University, Germany). The bovine oral or nasal  
173 swabs that were submitted to the Friedrich-Loeffler Institut for routine diagnostics were taken by  
174 the responsible farm veterinarians in the context of the health monitoring program of the  
175 respective farms, no permissions were necessary to collect the specimens. The unrelated cattle  
176 trial was reviewed by the responsible state ethics commission and was approved by the  
177 competent authority (permission number LALLF M-V/TSD/7221.3-2-016/17).

178

179 **Conflict of interest**

180 None.

181

182 **References**

183 Abdalhamid B, Bilder CR, McCutchen EL, Hinrichs SH, Koepsell SA, Iwen PC. Assessment of  
184 Specimen Pooling to Conserve SARS CoV-2 Testing Resources. *American journal of*  
185 *clinical pathology* 2020;153(6):715-8.

186 Corman VM, Landt O, Kaiser M, Molenkamp R, Meijer A, Chu DKW, et al. Detection of 2019  
187 novel coronavirus (2019-nCoV) by real-time RT-PCR. *Euro Surveill* 2020;25(3).

188 Eis-Hübinger AM, Hönemann M, Wenzel JJ, Berger A, Widera M, Schmidt B, et al. Ad hoc  
189 laboratory-based surveillance of SARS-CoV-2 by real-time RT-PCR using minipools of  
190 RNA prepared from routine respiratory samples. *J Clin Virol* 2020;127:104381.

- 191 European Commission. COVID-19 EU recommendations for testing strategies. Online available:  
192 [https://ec.europa.eu/info/sites/info/files/covid19\\_-\\_eu\\_recommendations\\_on\\_testing](https://ec.europa.eu/info/sites/info/files/covid19_-_eu_recommendations_on_testing)  
193 [\\_strategies\\_v2.pdf](#), last accessed: 20 May 2020 2020.
- 194 FAO. Things to know about the ring test. Food and Agriculture Organization of the United  
195 Nations, online available: [http://www.fao.org/ag/againfo/home/documents/2015\\_](http://www.fao.org/ag/againfo/home/documents/2015_)  
196 [Announcement\\_Ring\\_test.pdf](#) 2015.
- 197 Hasell J, Ortiz-Ospina E, Mathieu E, Ritchie H, Beltekian D, Macdonald B, et al. Coronavirus  
198 (COVID-19) Testing. Our World in Data, online available:  
199 <https://ourworldindata.org/coronavirus-testing>, last accessed: 16 May 2020 2020.
- 200 He X, Lau EHY, Wu P, Deng X, Wang J, Hao X, et al. Temporal dynamics in viral shedding and  
201 transmissibility of COVID-19. *Nature medicine* 2020;26(5):672-5.
- 202 Mögling R, Meijer A, Berginc N, Bruisten S, Charrel R, Coutard B, et al. Delayed Laboratory  
203 Response to COVID-19 Caused by Molecular Diagnostic Contamination. *Emerg Infect*  
204 *Dis* 2020;26(8).
- 205 Rahman H, Carter I, Basile K, Donovan L, Kumar S, Tran T, et al. Interpret with caution: An  
206 evaluation of the commercial AusDiagnostics versus in-house developed assays for the  
207 detection of SARS-CoV-2 virus. *J Clin Virol* 2020;127:104374.
- 208 Rivett L, Sridhar S, Sparkes D, Routledge M, Jones NK, Forrest S, et al. Screening of healthcare  
209 workers for SARS-CoV-2 highlights the role of asymptomatic carriage in COVID-19  
210 transmission. *Elife* 2020;9.
- 211 Robert-Koch-Institut. Erfassung der SARS-CoV-2-Testzahlen in Deutschland (updated May 14  
212 2020). *Epid Bull* 2020;20:17.

- 213 Wernike K, Hoffmann B, Kalthoff D, König P, Beer M. Development and validation of a triplex  
214 real-time PCR assay for the rapid detection and differentiation of wild-type and  
215 glycoprotein E-deleted vaccine strains of Bovine herpesvirus type 1. *J Virol Methods*  
216 2011;174(1-2):77-84.
- 217 Wernike K, Michelitsch A, Aebischer A, Schaarschmidt U, Konrath A, Nieper H, et al. The  
218 occurrence of a commercial N(pro) and E(rns) double mutant BVDV-1 live-vaccine strain  
219 in newborn calves. *Viruses* 2018;10(5).
- 220 WHO. Coronavirus disease (COVID-19) technical guidance: Laboratory testing for 2019-nCoV  
221 in humans. Online available: [https://www.who.int/emergencies/diseases/novel-](https://www.who.int/emergencies/diseases/novel-coronavirus-2019/technical-guidance/laboratory-guidance)  
222 [coronavirus-2019/technical-guidance/laboratory-guidance](https://www.who.int/emergencies/diseases/novel-coronavirus-2019/technical-guidance/laboratory-guidance), last accessed: 16 May 2020  
223 2020a.
- 224 WHO. COVID- 19 strategy update - 14 April 2020. Online available:  
225 <https://www.who.int/publications-detail/covid-19-strategy-update---14-april-2020>; last  
226 accessed: 16 May 2020 2020b.
- 227 WHO. Laboratory testing strategy recommendations for COVID-19: interim guidance, 21 March  
228 2020. Online available: [https://www.who.int/publications-detail/laboratory-testing-](https://www.who.int/publications-detail/laboratory-testing-strategy-recommendations-for-covid-19-interim-guidance)  
229 [strategy-recommendations-for-covid-19-interim-guidance](https://www.who.int/publications-detail/laboratory-testing-strategy-recommendations-for-covid-19-interim-guidance), last accessed 20 May 2020  
230 2020c.
- 231 WHO. Pneumonia of unknown cause – China. Online available: [https://www.who.int/csr/don/05-](https://www.who.int/csr/don/05-january-2020-pneumonia-of-unkown-cause-china)  
232 [january-2020-pneumonia-of-unkown-cause-china](https://www.who.int/csr/don/05-january-2020-pneumonia-of-unkown-cause-china), last accessed: 16 May 2020 2020d.
- 233 Yelin I, Aharony N, Shaer Tamar E, Argoetti A, Messer E, Berenbaum D, et al. Evaluation of  
234 COVID-19 RT-qPCR test in multi-sample pools. *Clinical infectious diseases : an official*  
235 *publication of the Infectious Diseases Society of America* 2020.

236 Zhu N, Zhang D, Wang W, Li X, Yang B, Song J, et al. A Novel Coronavirus from Patients with  
237 Pneumonia in China, 2019. N Engl J Med 2020;382(8):727-33.  
238

239 **Table 1:** RNA preparations from SARS-CoV-2 negative human throat swabs, bovine nasal or oral swabs and further negative controls  
 240 (phosphate buffered saline (PBS) or nuclease-free water) were tested by different batches of the identical in-house primers and probe  
 241 (Corman et al., 2020). The primers/probe sets are named according to the company at which they were synthesized, the delivery dates  
 242 are given in brackets. When several sets were ordered at the same supplier, they are consecutively numbered. The mean quantification  
 243 cycle values (Cq) including standard deviations for the false positive results are given in brackets.

244

| sample material               | supplier A-1<br>(March 25)<br>nCoV_IP4<br>no. tested/<br>pos. (Cq*) | supplier A-1<br>(March 25)<br>E-Sarbeco<br>no. tested/<br>pos. (Cq) | supplier A-2<br>(April 07)<br>E-Sarbeco<br>no. tested/<br>pos. (Cq) | supplier A-3<br>(May 07)<br>E-Sarbeco<br>no. tested/<br>pos. (Cq) | supplier B<br>(April 02)<br>E-Sarbeco<br>no. tested/<br>pos. (Cq) | supplier C-1<br>(April 15)<br>E-Sarbeco<br>no. tested/<br>pos. (Cq) | supplier C-2<br>(April 24)<br>E-Sarbeco<br>no. tested/<br>pos. (Cq) | supplier D<br>(March 27)<br>E-Sarbeco<br>no. tested/<br>pos. (Cq) |
|-------------------------------|---------------------------------------------------------------------|---------------------------------------------------------------------|---------------------------------------------------------------------|-------------------------------------------------------------------|-------------------------------------------------------------------|---------------------------------------------------------------------|---------------------------------------------------------------------|-------------------------------------------------------------------|
| throat swab, human            | 41/0                                                                | 41/0                                                                | 41/3 (38.5±0.4)                                                     | 41/1 (38.5)                                                       | 41/1 (40.9)                                                       | n.d.*                                                               | n.d.                                                                | n.d.                                                              |
| nasal or oral swab,<br>cattle | 47/0                                                                | 47/0                                                                | 47/8 (38.6±0.4)                                                     | 47/3 (39.4±0.9)                                                   | 47/3 (37.6±0.3)                                                   | n.d.                                                                | n.d.                                                                | n.d.                                                              |
| PBS* or water                 | 10/0                                                                | 10/0                                                                | 27/2 (38.4±0.3)                                                     | 27/1 (41.2)                                                       | 29/3 (39.3±0.9)                                                   | 6/6 (17.5±0.1)                                                      | 7/7 (22.4±0.2)                                                      | 4/4 (30.8±0.1)                                                    |

245 \*Table footnotes: PBS - phosphate buffered saline, Cq - quantification cycle value, n.d. - not done.

246 **Figure 1:** Real-time RT-PCR results generated by using two different batches of the identical in-  
247 house primers and probe (Corman et al., 2020) in combination with two distinct PCR kits. RIC -  
248 RNA isolation control, NTC - no template control, PC - positive control, AgPath - AgPath-ID™  
249 One-Step RT-PCR kit (Thermo Fisher Scientific, Germany), SSIII - SuperScript III One Step  
250 RT-PCR kit (Thermo Fisher Scientific, Germany)  
251

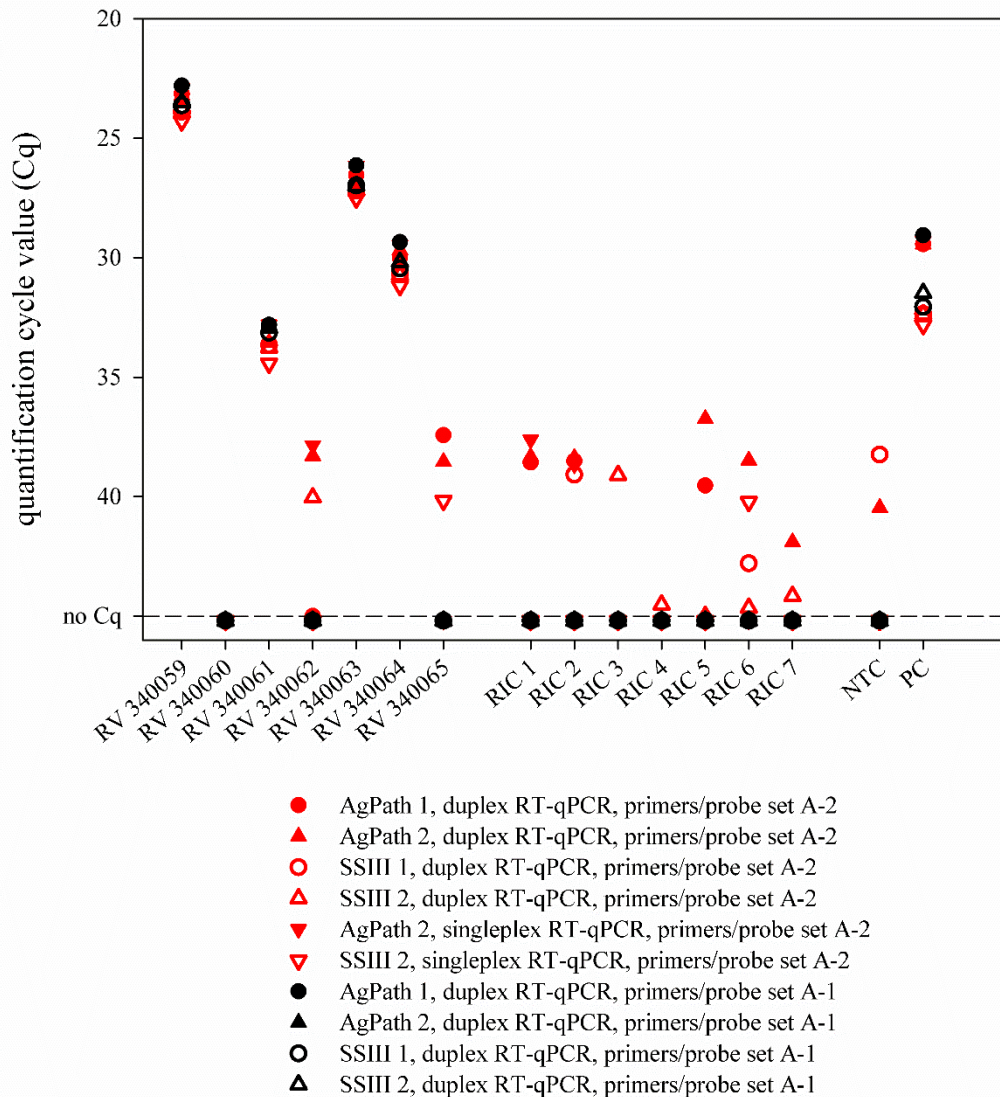

252

253 **Figure 2:** Real-time RT-PCR results of samples that were tested either individually (black dots)  
254 or in pools consisting of one SARS-CoV-2 positive and four negative samples (blue dots). RIC -  
255 RNA isolation control, NTC - no template control, PC - positive control, AgPath - AgPath-ID™  
256 One-Step RT-PCR kit (Thermo Fisher Scientific, Germany)

257

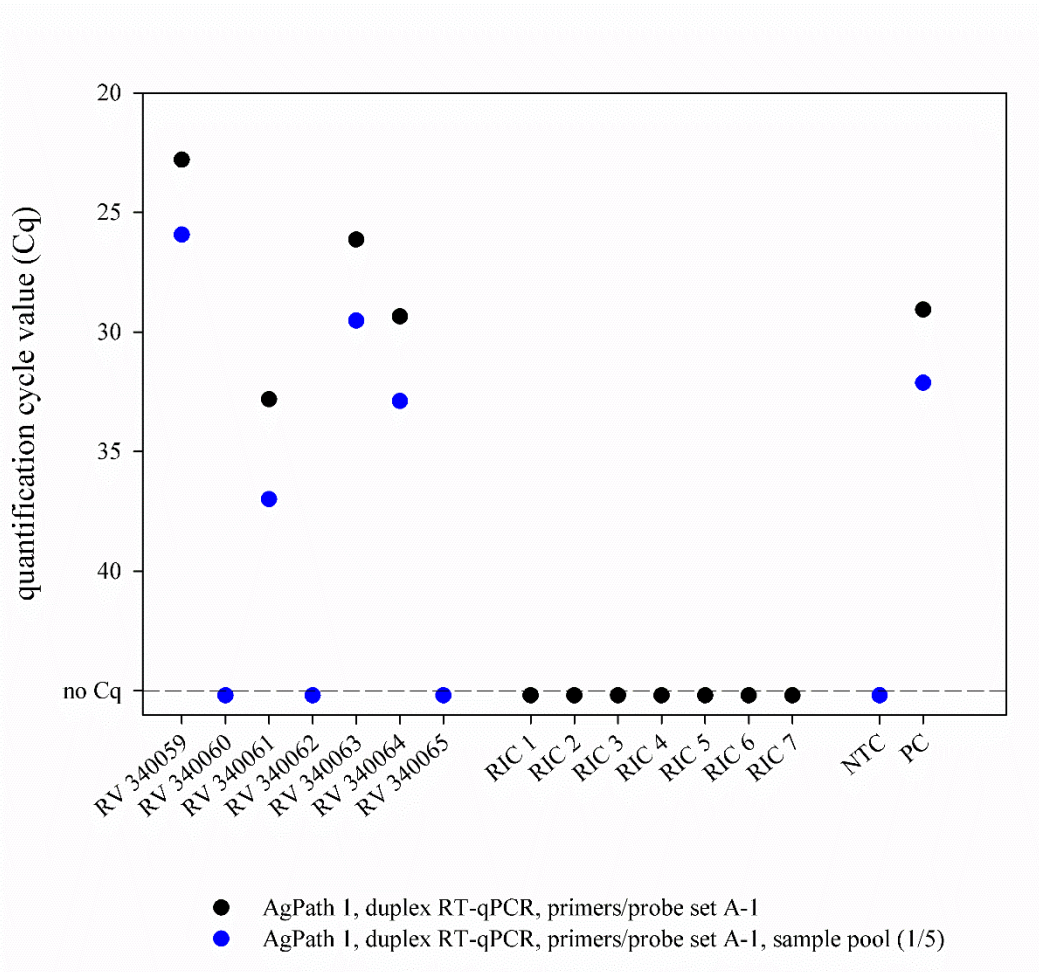

258
